# Supplementary material for: Scavenging neurotoxic aldehydes using lysine carbon dots
Source: Royal Society of Chemistry journal article supplement (doi:10.1039/d2na00804a), 2023-01-01
Supplement: d2na00804a1.pdf [file d2na00804a1.pdf]

## Scavenging neurotoxic aldehydes by lysine carbon dots

Daniel Nir Bloch,<sup>\*a</sup> Michele Sandre,<sup>\*b,c</sup> Shani Ben-Zichri,<sup>a</sup> Anna Masato,<sup>c,d</sup> Sofiya Kolusheva,<sup>e</sup> Luigi Bubacco<sup>#c,d</sup> and Raz Jelinek<sup>#a,e</sup>

### Raw gels and blots

#### Figure 7A

Uncropped SDS-PAGE Comassie Blue stained image of the three replicated experiments. The rectangle with dotted line represents the image presented in the article.

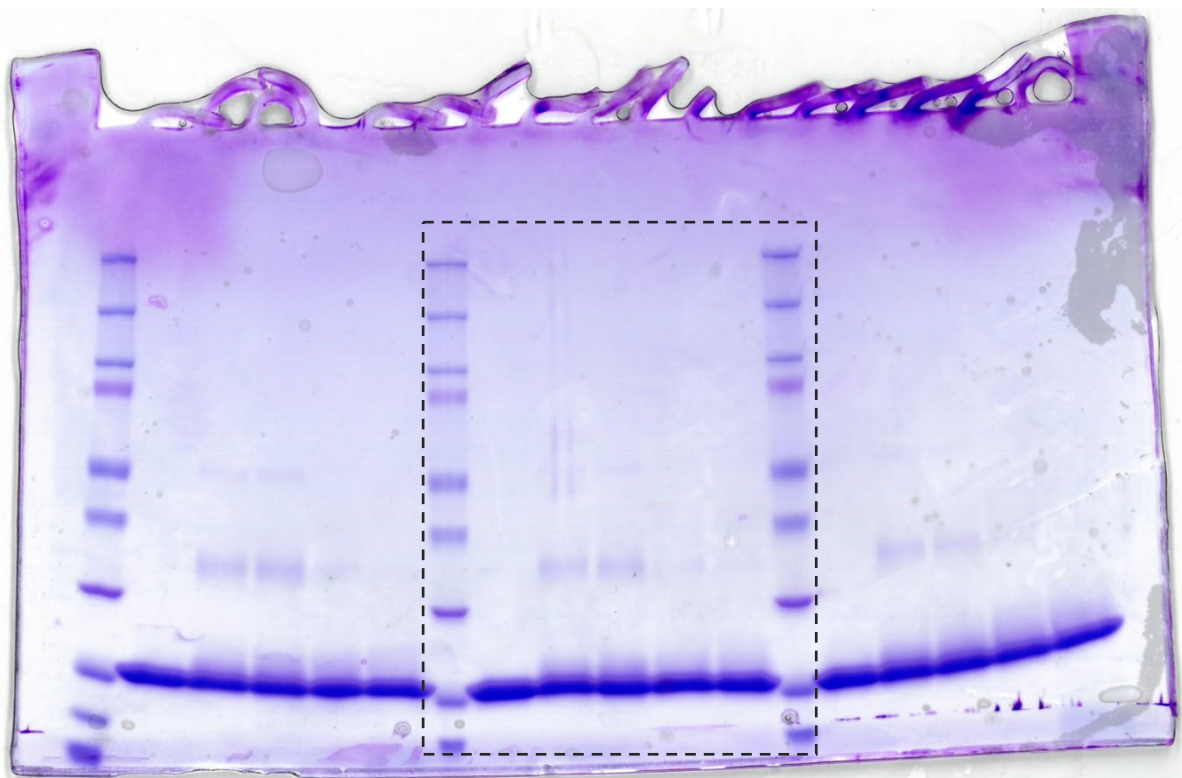

#### Figure 7B

Uncropped SDS-PAGE 800nm NiRF acquisition of the three replicated experiments. The rectangle with dotted line represents the image presented in the article.

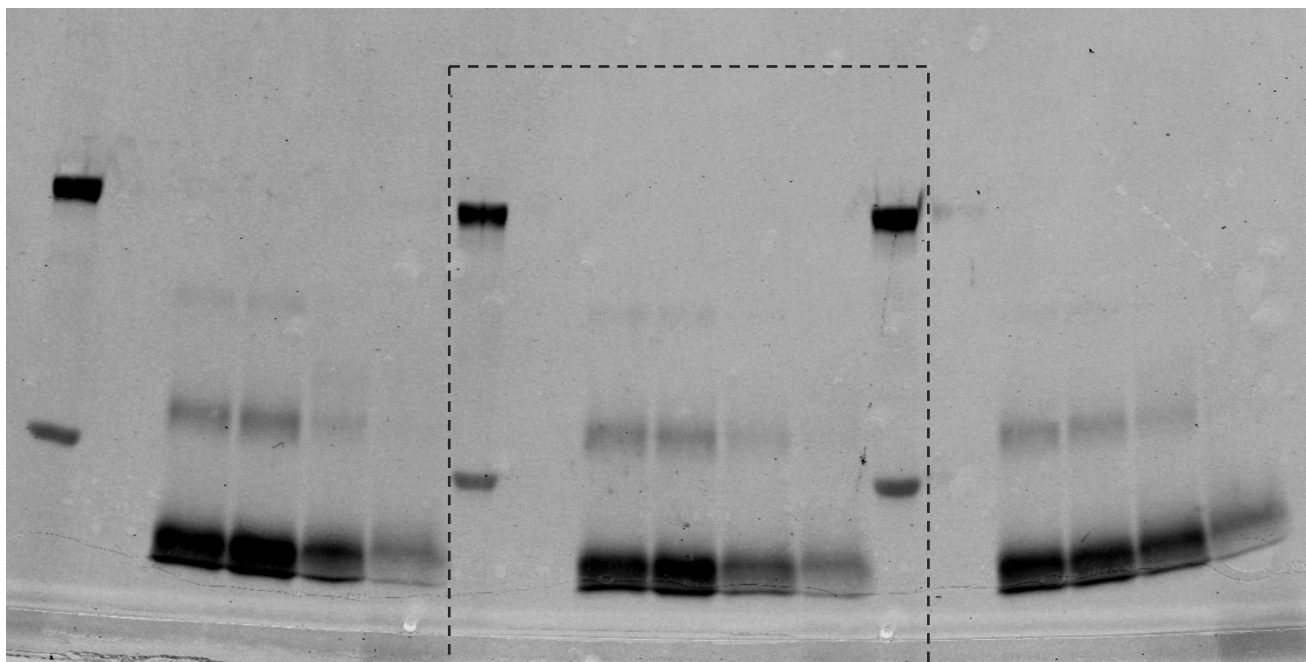

## Figure 8B

Uncropped Western Blot acquisition of the experiment presented in Fig. 8B. The rectangle with dotted line represents the image presented in the article

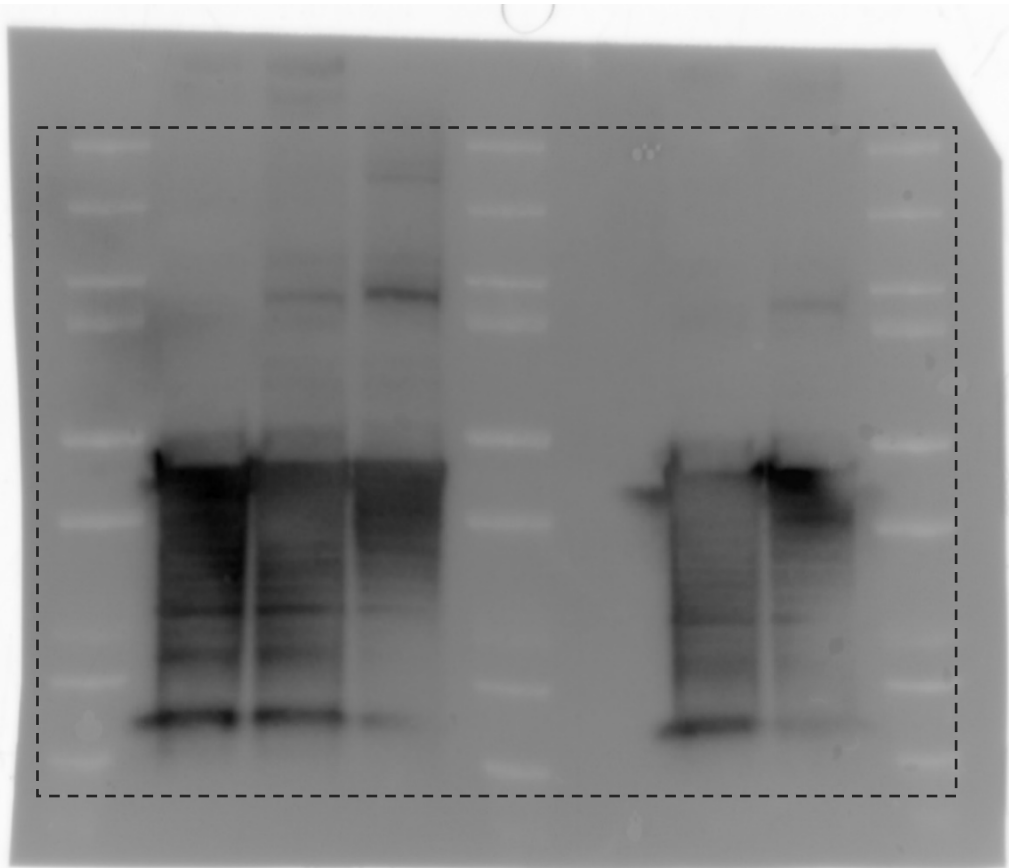

IB:  $\alpha$ -Syn MJFR1 1:10000 (with MW markers)

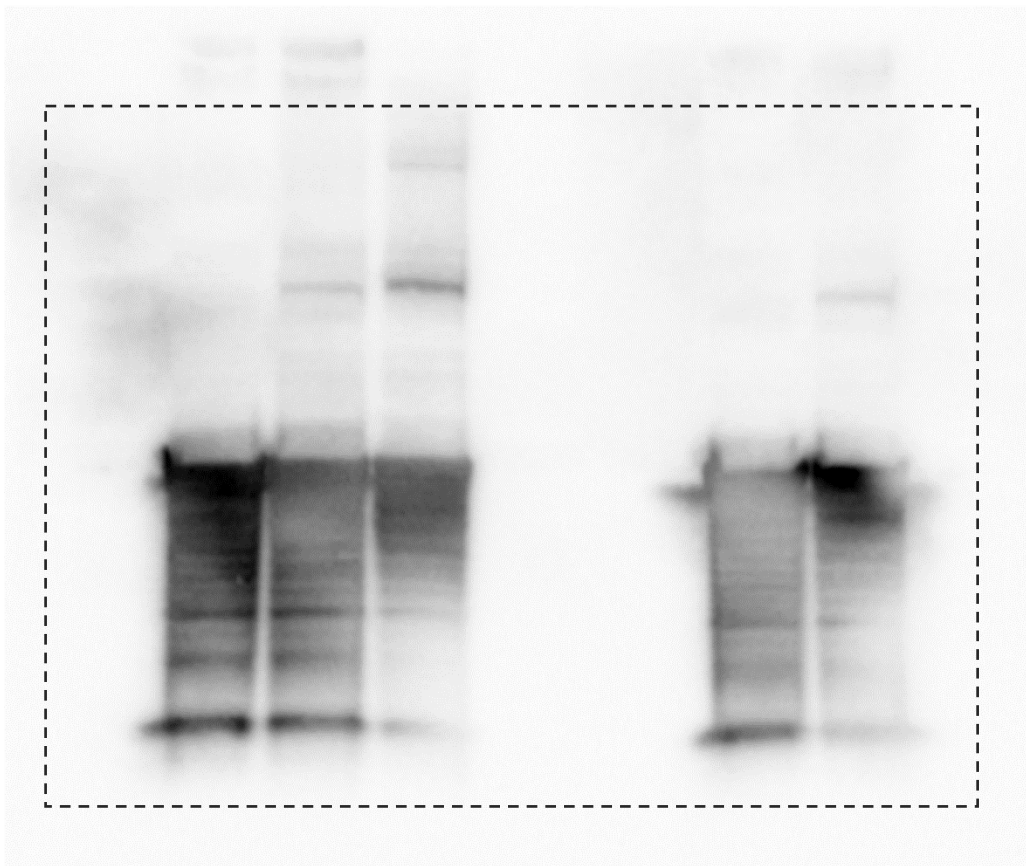

IB:  $\alpha$ -Syn MJFR1 1:10000 (without MW markers)

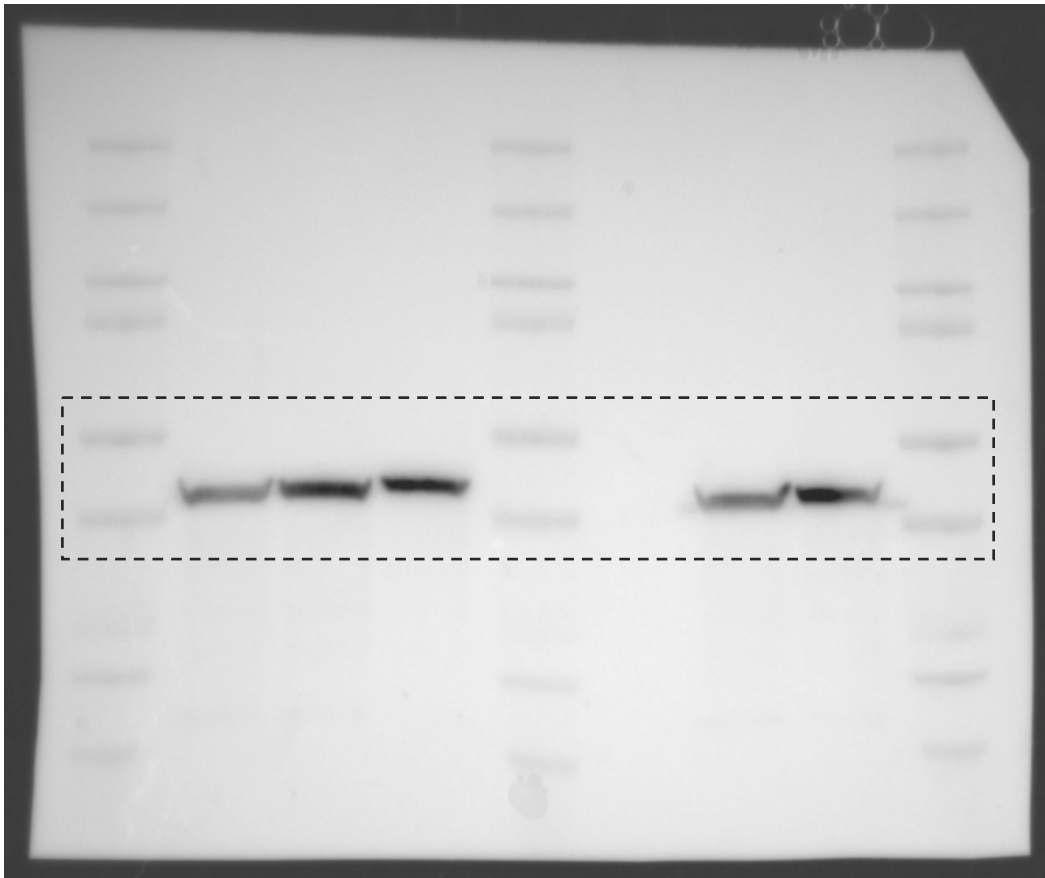

IB: Actin

# Figure 8C

Uncropped Western Blot acquisition of the experiment presented in Fig. 8C. The rectangle with dotted line represents the image presented in the article.

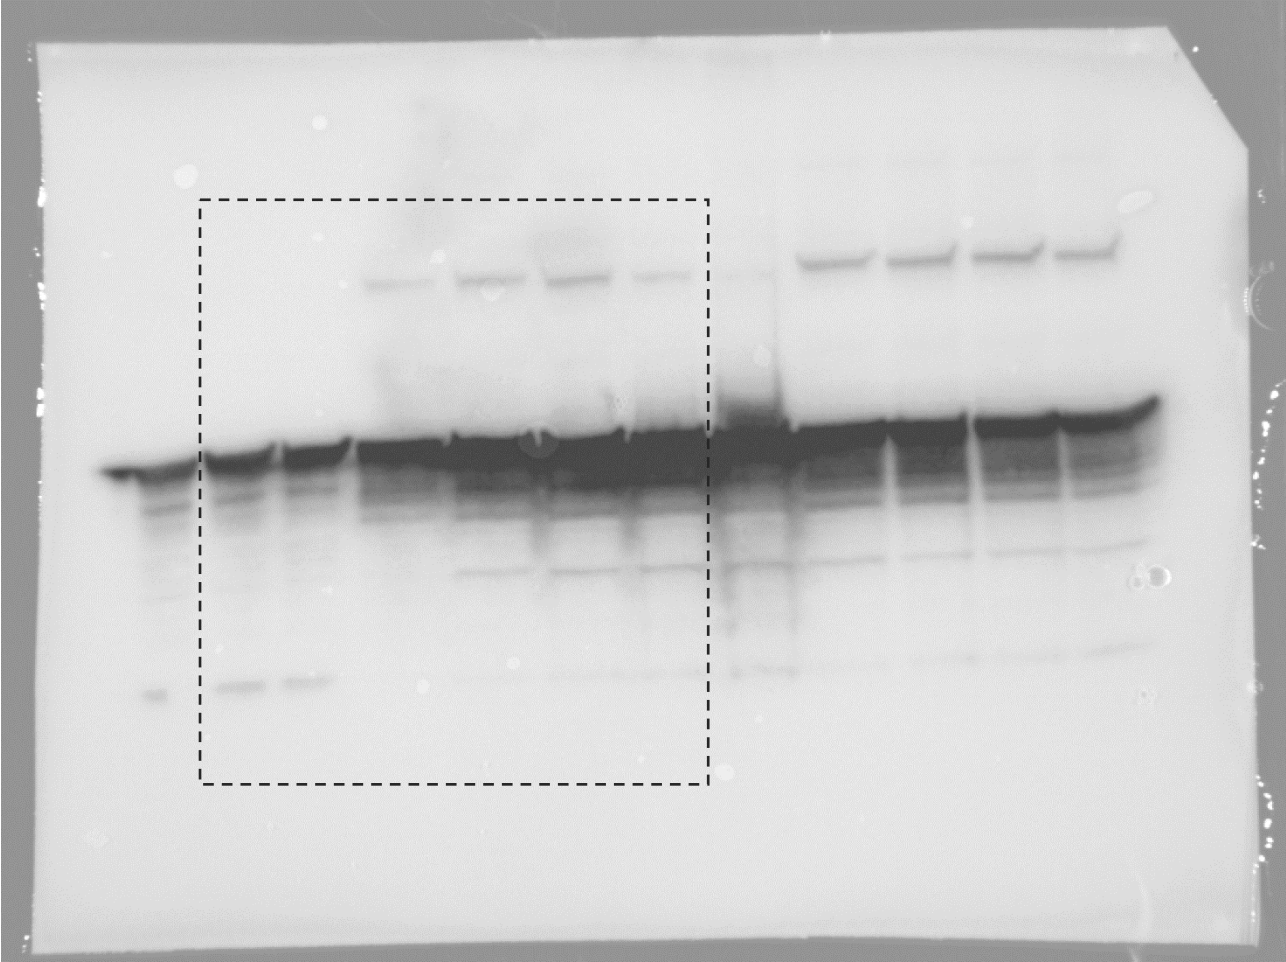

IB:  $\alpha$ -Syn MJFR1 1:10000

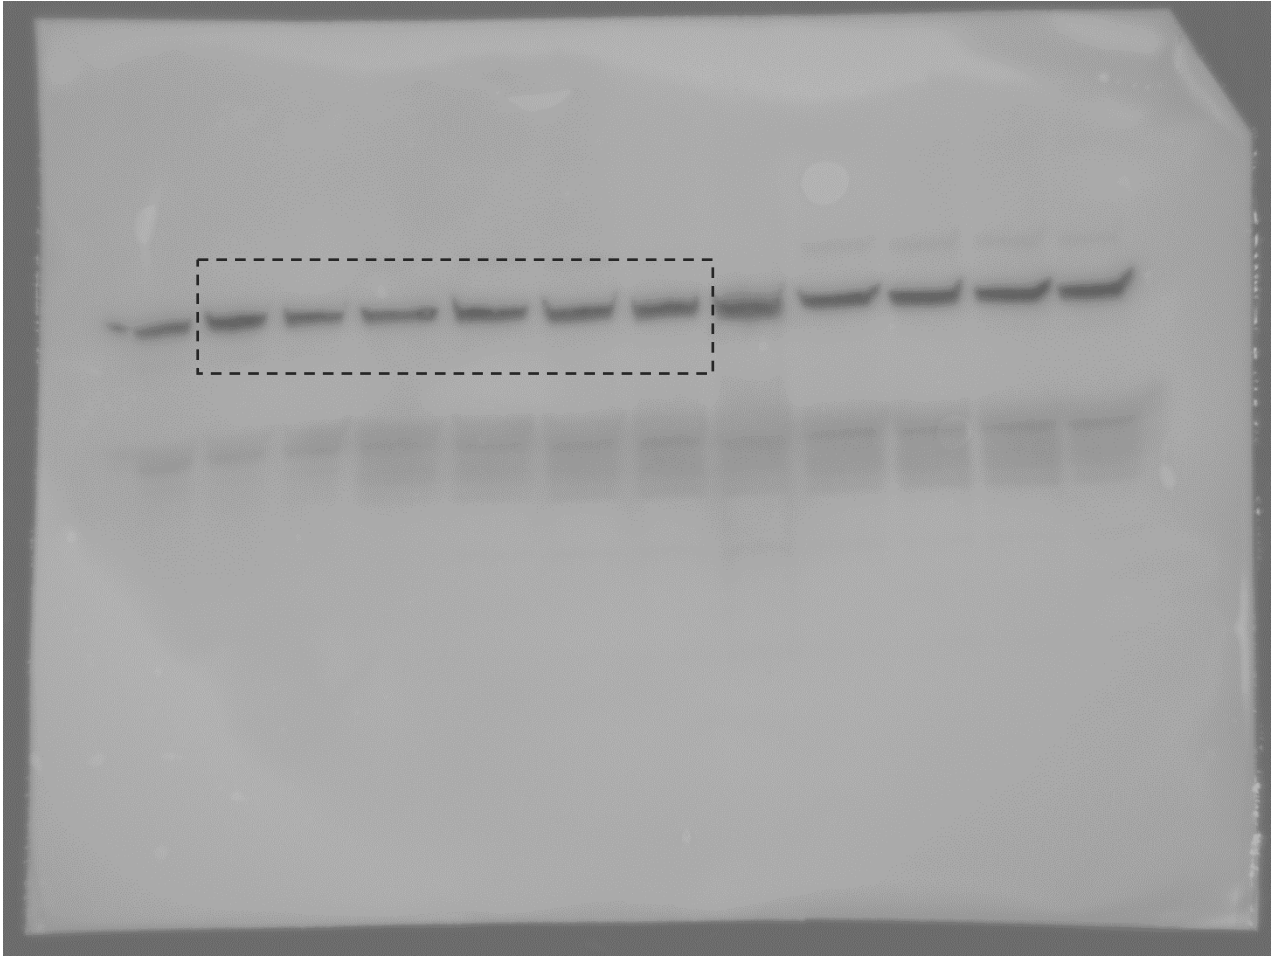

IB: HSP70
