# Supplementary material for: Scavenging neurotoxic aldehydes using lysine carbon dots
Source: Royal Society of Chemistry journal article supplement (doi:10.1039/d2na00804a), 2023-01-01
Supplement: d2na00804a2.pdf [file d2na00804a2.pdf]

## Scavenging neurotoxic aldehydes by lysine carbon dots

Daniel Nir Bloch,<sup>\*a</sup> Michele Sandre,<sup>\*b,c</sup> Shani Ben-Zichri,<sup>a</sup> Anna Masato,<sup>c,d</sup> Sofiya Kolusheva,<sup>e</sup> Luigi Bubacco<sup>#c,d</sup> and Raz Jelinek<sup>#a,e</sup>

### Supporting Information

Figure SI-1

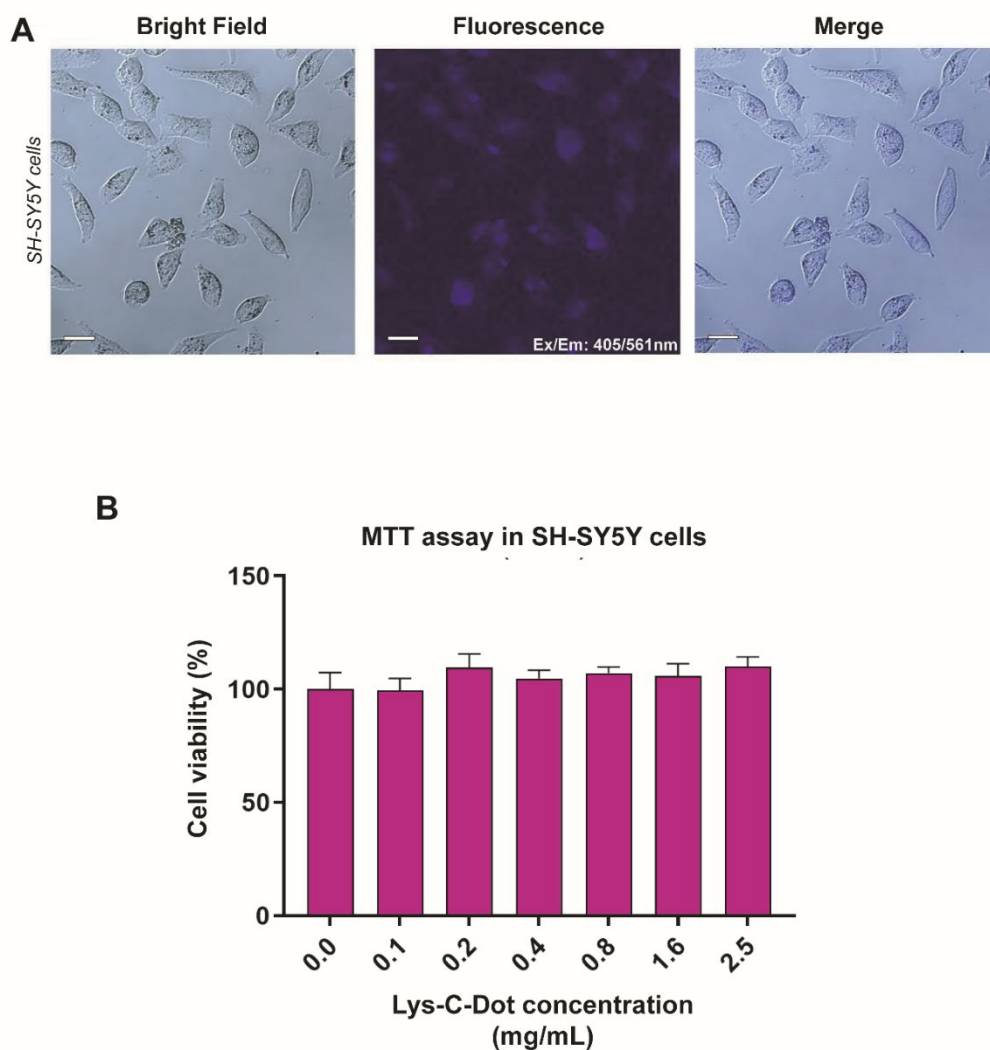

**Fig. SI-1** Lys-C-Dot internalization and cytotoxicity results in SH-SY5Y cells. (A) Internalization was studied detecting intrinsic fluorescence signal of Lys-C-dots at 561 nm after excitation at 405 nm. SH-SY5Y were treated at 2.5 mg/mL for 24 hours and then analyzed at confocal microscopy. Representative bright field and fluorescence images are shown, scale bar 50  $\mu$ m. (B) Viability of SH-SY5Y cells were analyzed by MTT assay 24 hours treatment with increasing concentration of Lys-C-Dots. Cell viability is normalized on untreated cells as 100%. Data are presented as mean  $\pm$  SEM.
